# Supplementary material for: Development of a TaqMan Probe-Based Insulated Isothermal Polymerase Chain Reaction (iiPCR) Assay for Detection of Fusarium oxysporum f. sp. cubense Race 4
Source: PubMed Central journal article supplement (PMC4957775; doi:10.1371/journal.pone.0159681), 2016-07-22
Supplement: pone.0159681.s001.pdf [file pone.0159681.s001.pdf]

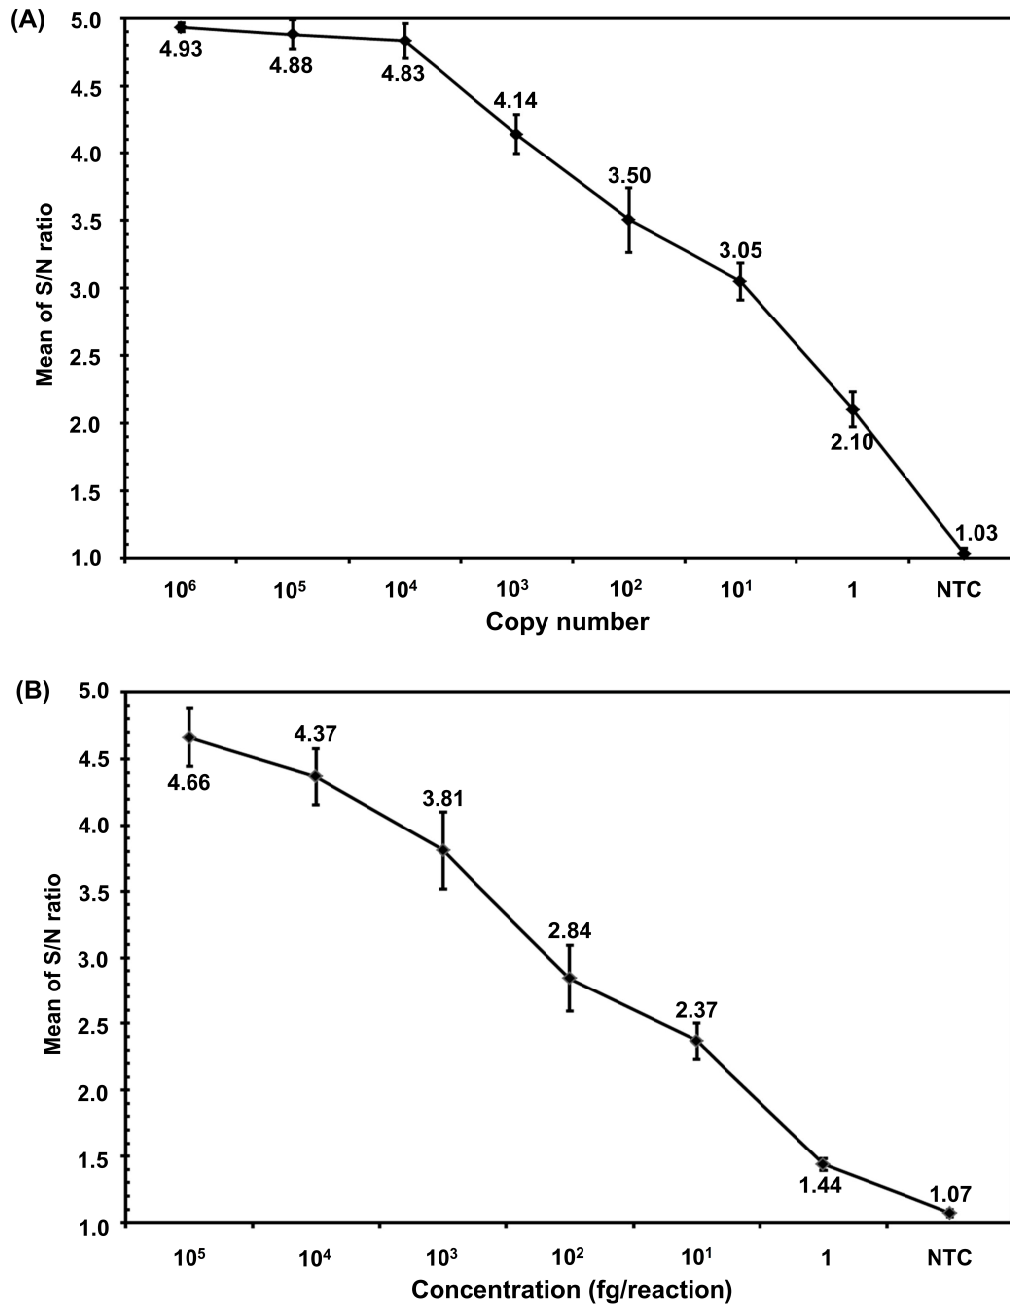

**S1 Fig. Effect of banana genomic DNA (gDNA) on the detection sensitivity of Foc race 4 TaqMan probe-based insulated isothermal PCR (iiPCR) assay.**

Fifty ng banana gDNA was added to Foc race 4 iiPCR reaction mixture containing (A) pFoc<sub>242</sub> standard template (ranging from  $10^6$  to 1 copies) or *Fusarium oxysporum* f. sp. *cubense* (Foc) race 4 gDNA (ranging from  $10^5$  to 1 fg) for sensitivity evaluation. The S/N ratios (fluorescent intensity<sub>after</sub>/fluorescent intensity<sub>before</sub>) of Foc race 4 iiPCR assay were calculated. Mean S/N ratio of each reaction was plotted against standard template or Foc race 4 gDNA. Error bars represent the standard deviations from seven replicate reactions.
